# Supplementary material for: The microRNA-200/Zeb1 axis regulates ECM-dependent β1-integrin/FAK signaling, cancer cell invasion and metastasis through CRKL
Source: PubMed Central journal article supplement (PMC4700473; doi:10.1038/srep18652), 2016-01-05
Supplement: srep18652-s1.pdf [file srep18652-s1.pdf]

## **The microRNA-200/Zeb1 axis regulates ECM-dependent $\beta$ 1-integrin/FAK signaling, cancer cell invasion and metastasis through CRKL**

Christin Ungewiss<sup>1</sup>, Zain H. Rizvi<sup>1</sup>, Jonathon D. Roybal<sup>1</sup>, David Peng<sup>1</sup>, Kathryn Gold<sup>1</sup>, Dong-Hoon Shin<sup>1</sup>, Chad J. Creighton<sup>3,4</sup>, Don L. Gibbons<sup>1,2,5</sup>

<sup>1</sup>Department of Thoracic/Head and Neck Medical Oncology, The University of Texas MD Anderson Cancer Center, Houston, TX 77030, USA

<sup>2</sup>Department of Molecular and Cellular Oncology, The University of Texas MD Anderson Cancer Center, Houston, TX 77030, USA.

<sup>3</sup>Department of Bioinformatics and Computational Biology, 1400 Pressler St., The University of Texas MD Anderson Cancer Center, Houston, TX 77030

<sup>4</sup>Department of Medicine and Dan L. Duncan Cancer Center, Baylor College of Medicine, Houston, TX 77030

<sup>5</sup>Corresponding author: [dlgibbon@mdanderson.org](mailto:dlgibbon@mdanderson.org), 713-792-9536 (phone), 713-792-1220 (fax).

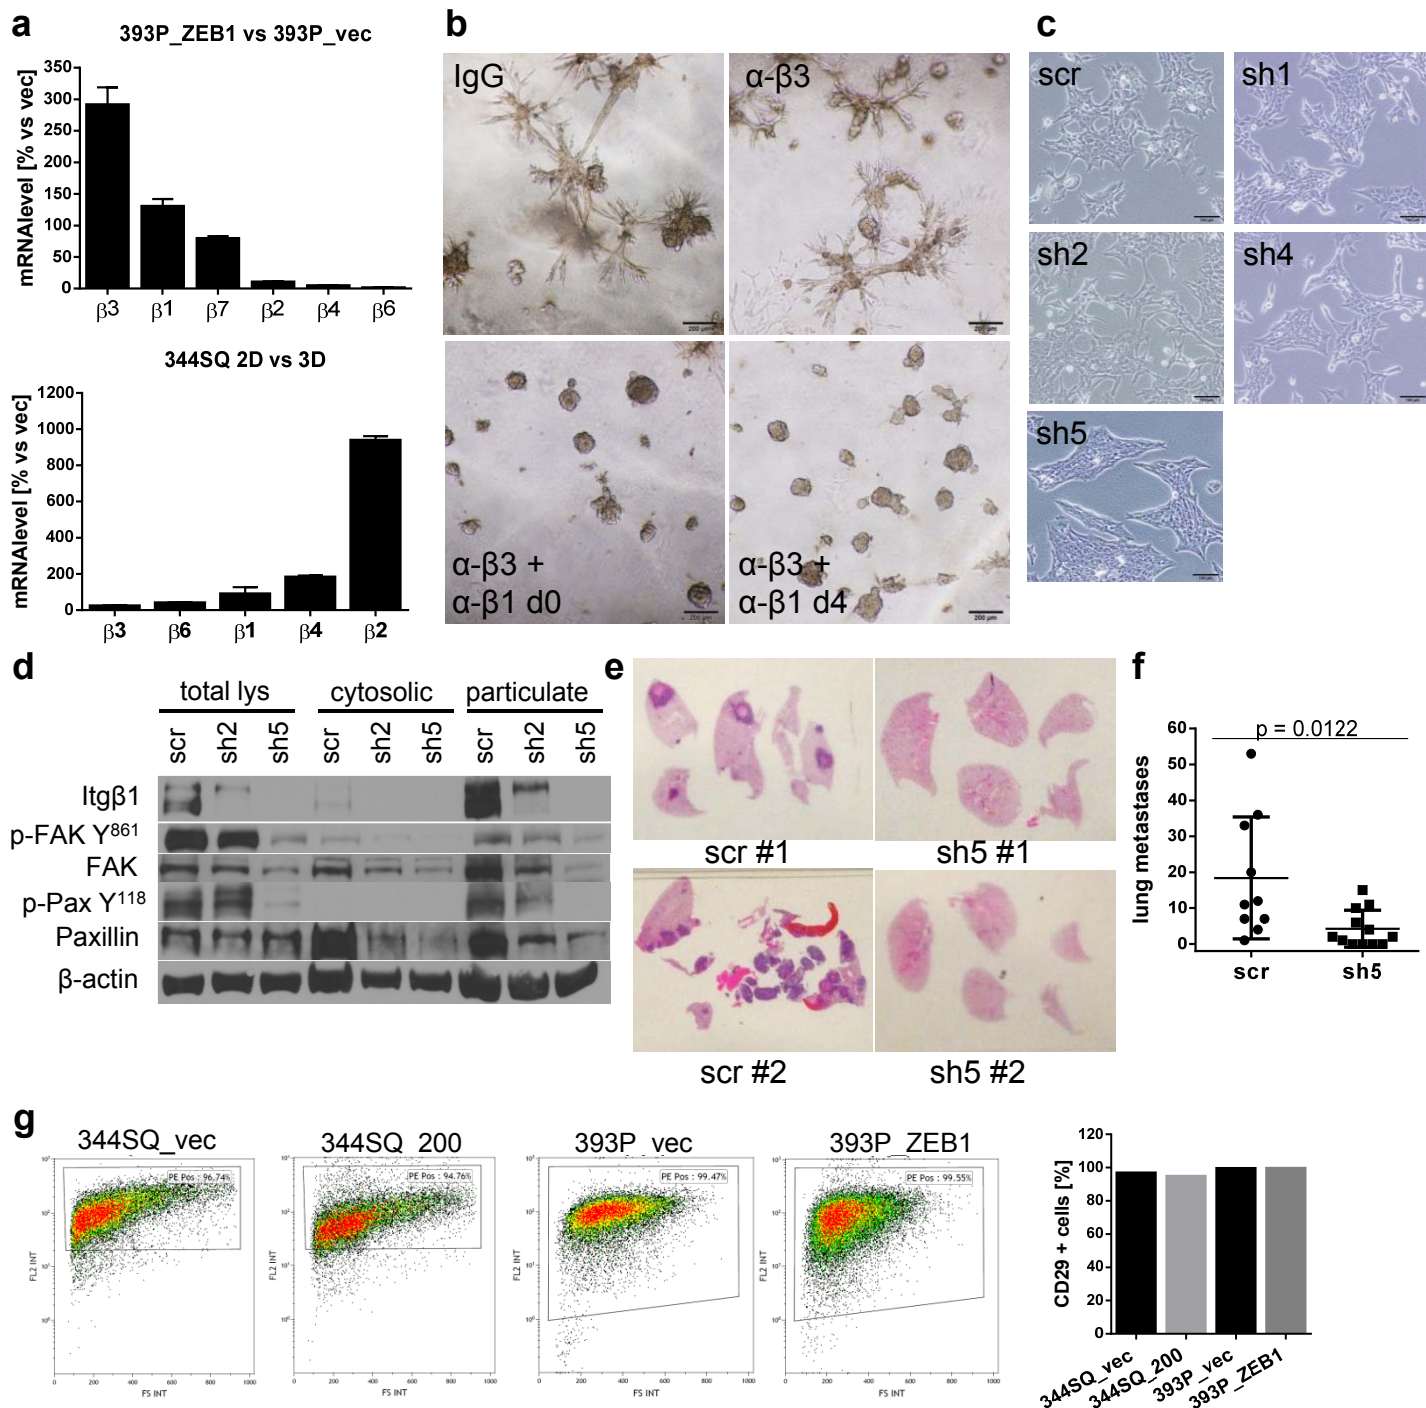

**Supplementary Figure S1. Integrin  $\beta 1$  is required for mesenchymal cell invasion.** (A) Quantitative RT-PCR analysis of Integrin  $\beta$  subunits in 393P\_ZEB1 vs vec cells (top panel) and in 344SQ grown in 2D vs 3D Matrigel (lower panel) (B) 393P\_ZEB1 cells grown in 1.75 mg/ml Matrigel/Collagen I and treated with an Integrin  $\beta 3$ -blocking antibody alone, in combination with an Integrin  $\beta 1$ -blocking antibody (added at the days indicated) or IgG control for 7 days. (C) Morphology of 393P\_ZEB1 cells after ITG $\beta 1$  knockdown. (D) Western Blot analysis of 344SQ ITG $\beta 1$  knockdown cells after cytosolic and particulate separation. (E) H&E of lung sections of animals injected with 344SQ scr or 344SQ ITG $\beta 1$  sh5. (F) ITG $\beta 1$  knockdown in 344SQ cells reduces lung metastases *in vivo* (with one animal outlier removed). (G) FACS analysis of the murine cells for PE-CD29 positive cells.

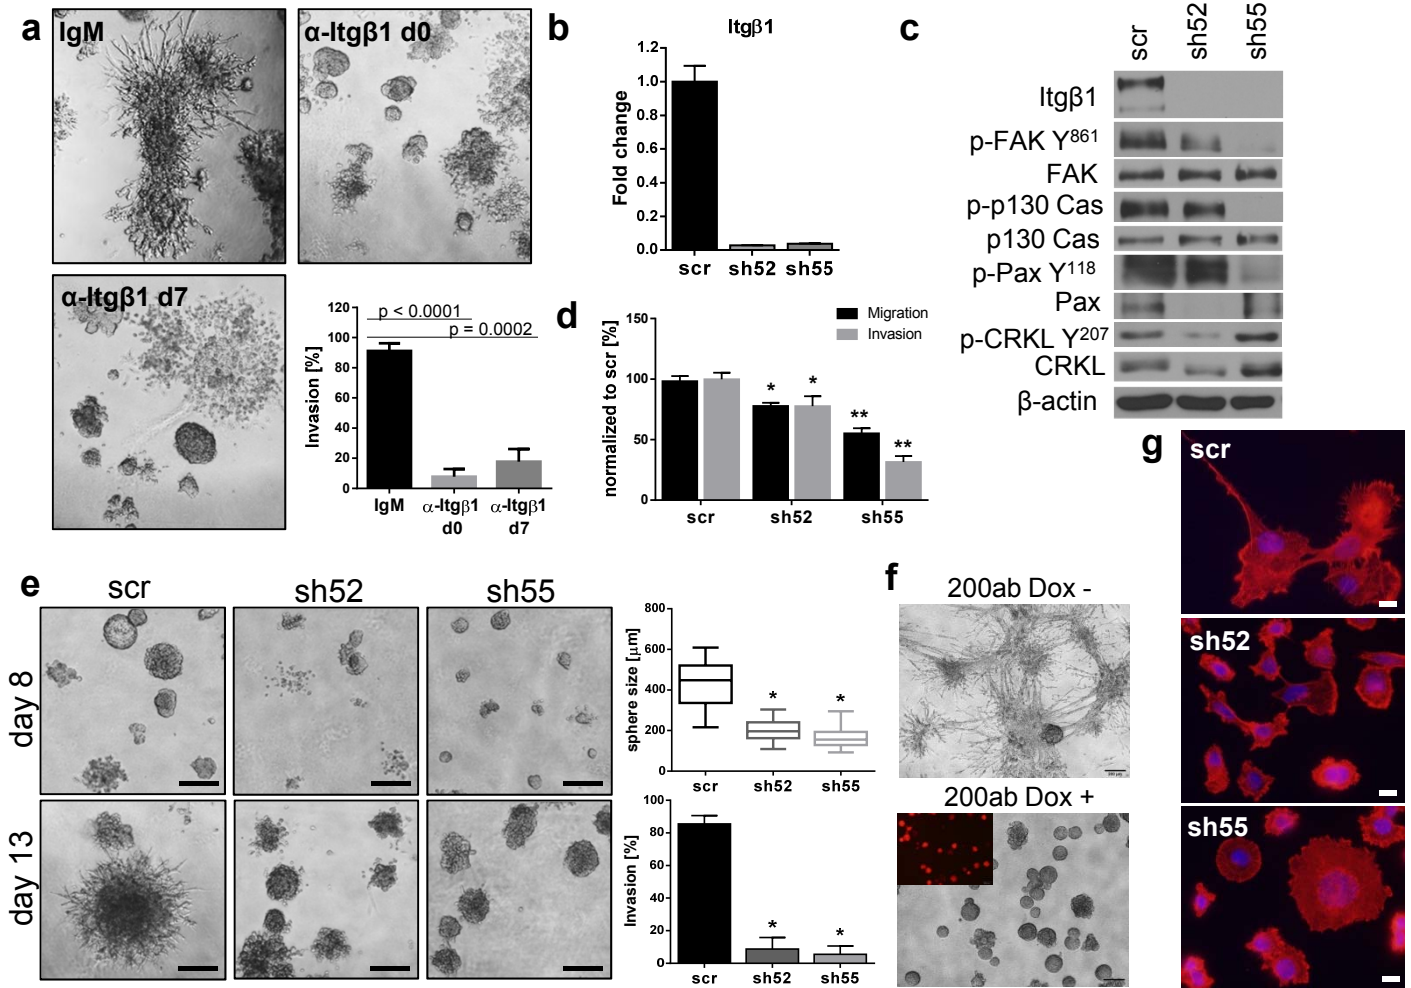

**Supplementary Figure S2. Integrin  $\beta$ 1-collagen I contact is necessary for H157 cell growth and invasion.** (A) H157 cells grown in 1.5 mg/ml Matrigel/Collagen I and treated with an ITG $\beta$ 1-blocking antibody from day 0 or day 7 or IgM control. 90 structures were scored for invasiveness. (B) Quantitative RT-PCR and (C) Western Blot analysis of H157 cells after Itg $\beta$ 1-shRNA knockdown shows a partial MET. (D) ITG $\beta$ 1-knockdown cells grown on Matrigel/Collagen I for 13 days and analyzed for sphere size (30 structures) and invasiveness (90 structures). Scale bar is 200  $\mu$ m. \*  $p \leq 0.0001$  (E) In vitro migration and assay for the Itg $\beta$ 1 shRNA cells. \*  $p < 0.001$ , \*\*  $p < 0.0001$  (F) H157 cells grown in 3D culture (Matrigel/Collagen mixture) for 11 days. (G) H157 Itg $\beta$ 1 knockdown cells stained for F-actin with Phalloidin and DAPI for the nucleus. Scale bar is 200  $\mu$ m.

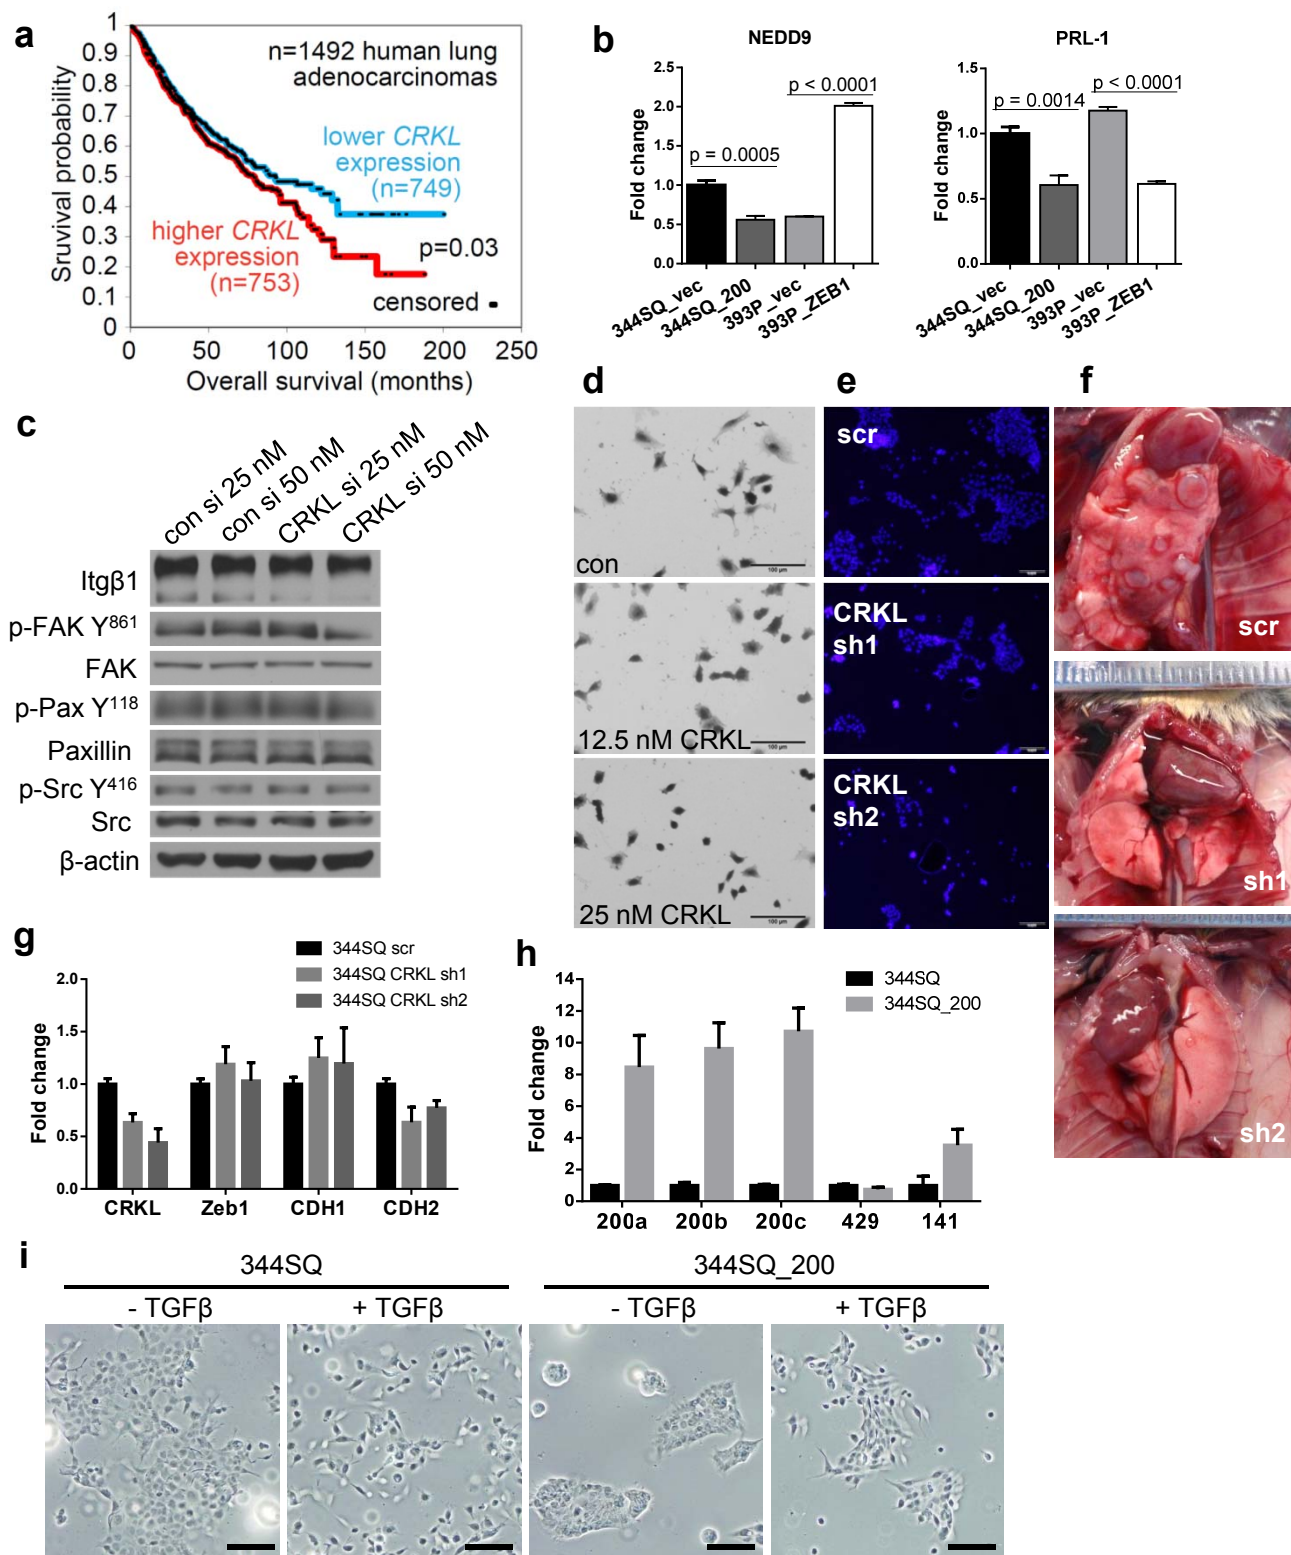

**Supplementary Figure S3. CRKL knockdown causes a decrease in cell adhesion and *in vivo* metastases.** (A) KM survival analysis of patients from the lung compendium database stratified based upon CRKL expression. (B) qRT-PCR analysis of adaptor molecules in the paired epithelial and mesenchymal murine cell lines. (C) Western Blot analysis of CRKL siRNA 48 hrs post-transfection using different siRNA concentrations. (D) Adhesion assay of H157 on Fibronectin transfected with CRKL siRNA. (E) Adhesion assay of 344SQ CRKL knockdown cells on Fibronectin stained with DAPI. (F) Images of the lungs of mice injected with 344SQ scr or CRKL knockdown cells. (G) qPCR analysis of the EMT markers in the 344SQ CRKL shRNA cells. (H) miR-200 expression levels in the 344SQ vs. 344SQ\_200 cells. (i) Brightfield images of the 344SQ vs. 344SQ\_200 cells treated with TGFβ for 48 hrs on Fibronectin coated coverslips. Scale bar is 100 μm.

## Supplementary Table 1.

qPCR primer 5' to 3'

|             |                          |
|-------------|--------------------------|
| ms L32: F   | GGAGAAGGTTCAAGGGCCAG     |
| ms L32: R   | TGCTCCCATAACCGATGTTG     |
| ms Zeb1: F  | ATGCTCTGAACGCGCAGC       |
| ms Zeb1: R  | AATCGGCGATCTTTGAGAGCT    |
| ms CDH1: F  | CCATCTCAAGCTCGCGGATA     |
| ms CDH1: R  | TCCAACGTGGTCACTGGT       |
| ms CDH2: F  | TCCAGAGGGATCAAAGCCTGGGAC |
| ms CDH2: R  | CCGCATCAATGGCAGTGACCGT   |
| ms Vim: F   | TCCAAGCCTGACCTCACTGC     |
| ms Vim: R   | TTCATACTGCTGGCGCACAT     |
| ms Crb3: F  | CGGACCCTTTCACAAATAGCA    |
| ms Crb3: R  | CGTTGGACTCATCACCTGGG     |
| ms Itgb1: F | CTACTTCTGCACGATGTGATGAT  |
| ms Itgb1: R | TTGGCTGGCAACCCTTCTTT     |
| ms Itgb2: F | CAGGAATGCACCAAGTACAAAGT  |
| ms Itgb2: R | CCTGGTCCAGTGAAGTTCAGC    |
| ms Itgb3: F | CCACACGAGGCGTGAAGT       |
| ms Itgb3: R | CTTCAGGTTACATCGGGGTGA    |
| ms Itgb4: F | AGAGCTGTACCGAGTGCATC     |
| ms Itgb4: R | TGGTGTGATCTGGGTGTTCT     |
| ms Itgb6: F | GAAAACCCTGTCTCCCGCATA    |
| ms Itgb6: R | CGCTGAGAGGCTTATTTTGAAGG  |
| ms Itgb7: F | ACCTGAGCTACTCAATGAAGGA   |
| ms Itgb7: R | CACCGTTTTGTCCACGAAGG     |
| ms CRKL:F   | CCTGGACACTACCACCTTAATCG  |
| ms CRKL:R   | TCTTCTGCTGTAGGTAAGTTGGG  |
| ms CRK:F    | CTAATGCCTACGACAAGACAGCC  |
| ms CRK:R    | TGGGAAGTGACCTCGTTTGCCA   |
| ms PINCH: F | GGGTTTGTCAAGAATGCTGGCAG  |
| ms PINCH: R | GCACAGTTGAAGTGGTCTGGATG  |
| ms ILK: F   | GTGCTGAAGGTTTCGTGACTGGA  |
| ms ILK: R   | TCCAGTGTGTGATGAGGGTTGG   |
| hs L32: F   | CCTTGTGAAGCCCAAGATCG     |
| hs L32: R   | TGCCGGATGAACTTCTTGGT     |
| hs Zeb1: F  | GGCATAACCTACTCAACTACGG   |
| hs Zeb1: R  | TGGGCGGTGTAGAATCAGAGTC   |
| hs Itgb1: F | GGATTCTCCAGAAGGTGGTTTCG  |
| hs Itgb1: R | TGCCACCAAGTTTCCCATCTCC   |
| hs CRKL: F  | ATCCACTACCTGGACACCACCA   |
| hs CRKL: R  | CCAGGTTATCTTCTGCTGTAGGC  |
